# Supplementary material
Source: ML conference proceedings conference paper supplement (https://proceedings.neurips.cc/paper_files/paper/2022/hash/f200119a40846e508954abcd61f5f3fd-Abstract.html)
Supplement: Supplementary file 1 [file f200119a40846e508954abcd61f5f3fd-Supplemental-Conference.pdf]

---

# Supplemental Material for PhysGNN: A Physics–Driven Graph Neural Network Based Model for Predicting Soft Tissue Deformation in Image–Guided Neurosurgery

---

**Yasmin Salehi, Dennis Giannacopoulos**  
Department of Electrical and Computer Engineering  
McGill University  
Montreal, QC, Canada

yasmin.salehi@mail.mcgill.ca, dennis.giannacopoulos@mcgill.ca

## A Finite Element Volume Mesh

Table 1 provides information on the finite element (FE) volume mesh that was used for generating Datasets 1 and 2.

Table 1: Finite element volume mesh statistics.

| Attribute                       | Value  |
|---------------------------------|--------|
| Mesh points                     | 9118   |
| Mesh tetrahedra                 | 55927  |
| Mesh faces                      | 112524 |
| Mesh faces on exterior boundary | 1340   |
| Mesh faces on input facets      | 2992   |
| Mesh edges on input segments    | 4488   |
| Steiner points inside domain    | 7618   |

## B Infrastructure Settings

The FE simulations in our study were carried out on quad-core Intel i7 @ 2.9 GHz CPU, while different PhysGNN models were trained on a Google Colab Pro server with 23GB of RAM and one NVIDIA P-100 GPU with 16 GB of video RAM.

## C Additional Results

The table below represents the median of absolute error in the  $x$ ,  $y$ , and  $z$  directions denoted as  $\delta x$ ,  $\delta y$ , and  $\delta z$  respectively, Euclidean error, and absolute position error.

Table 2: Median of the evaluation metrics resulted from the best-performing PhysGNN models on Datasets 1 and 2.

| Dataset              | Median Absolute Error ( $\delta x$ ) (mm) | Median Absolute Error ( $\delta y$ ) (mm) | Median Absolute Error ( $\delta z$ ) (mm) | Median Euclidean Error (mm) | Median Absolute Position Error (mm) |
|----------------------|-------------------------------------------|-------------------------------------------|-------------------------------------------|-----------------------------|-------------------------------------|
| Dataset 1 Validation | 0.0199                                    | 0.0228                                    | 0.0221                                    | 0.0531                      | 0.0303                              |
| Dataset 1 Test       | 0.0200                                    | 0.0227                                    | 0.0224                                    | 0.0537                      | 0.0303                              |
| Dataset 2 Validation | 0.0436                                    | 0.0537                                    | 0.0538                                    | 0.1295                      | 0.0656                              |
| Dataset 2 Test       | 0.0426                                    | 0.0534                                    | 0.0529                                    | 0.1285                      | 0.0646                              |

## D Comparison to Similar Studies

The summary table below compares our results with a few similar studies based on empirical grounds.

Table 3: Comparing our method with other studies on empirical basis.

| Study                 | Number of Nodes in the FE Mesh | Maximum Displacement in the Dataset(s) (mm) | Mean Absolute Position Error (mm) | Mean Euclidean Error (mm) | % of Euclidean Error Below 1 mm | Average of Maximum Euclidean Error per Simulation (mm) |
|-----------------------|--------------------------------|---------------------------------------------|-----------------------------------|---------------------------|---------------------------------|--------------------------------------------------------|
| Tonutti et al. [2017] | 1087                           | —                                           | 0.191                             | 0.18                      | —                               | —                                                      |
| Lorente et al. [2017] | 318960 – 494310                | 15                                          | —                                 | 0.07                      | 100                             | —                                                      |
| Liu et al. [2020]     | 1158                           | 30                                          | —                                 | 0.129                     | 98                              | 0.483                                                  |
|                       | 1158                           | 30                                          | —                                 | 0.392                     | 98                              | 1.011                                                  |
| <b>PhysGNN (ours)</b> | 9118                           | 24.5864                                     | 0.1612                            | 0.2049                    | 95.11                           | 2.5924                                                 |
|                       | 9118                           | 47.8233                                     | 0.2023                            | 0.3023                    | 94.60                           | 4.1952                                                 |

## References

- Haolin Liu, Ye Han, Daniel Emerson, Houriyeh Majditehran, Qi Wang, Yoed Rabin, and Levent Burak Kara. Real-time prediction of soft tissue deformations using data-driven nonlinear presurgical simulations. *arXiv preprint arXiv:2010.13823*, 2020.
- Delia Lorente, Francisco Martínez-Martínez, María José Rupérez, MA Lago, Marcelino Martínez-Sober, Pablo Escandell-Montero, José María Martínez-Martínez, Sandra Martínez-Sanchis, Antonio J Serrano-López, C Monserrat, et al. A framework for modelling the biomechanical behaviour of the human liver during breathing in real time using machine learning. *Expert Systems with Applications*, 71:342–357, 2017.
- Michele Tonutti, Gauthier Gras, and Guang-Zhong Yang. A machine learning approach for real-time modelling of tissue deformation in image-guided neurosurgery. *Artificial intelligence in medicine*, 80:39–47, 2017.
